# Supplementary material for: Computer vision enabled funnel adapted sensing tube (FAST) for power-free and pipette-free nucleic acid detection
Source: Royal Society of Chemistry journal article supplement (doi:10.1039/d2lc00586g), 2022-01-01
Supplement: d2lc00586g1.pdf [file d2lc00586g1.pdf]

ARTICLE

## Computer Vision Enabled Funnel Adapted Sensing Tube (FAST) for Power-Free and Pipette-Free Nucleic Acid Detection

Mengdi Bao,<sup>a</sup> Shuhuan Zhang,<sup>a</sup> Chad ten Pas,<sup>a</sup> Stephen J. Dollery,<sup>b</sup> Ruth V. Bushnell,<sup>b</sup> FNU Yuqing,<sup>a</sup> Rui Liu,<sup>a</sup> Guoyu Lu,<sup>c</sup> Gregory J. Tobin,<sup>b</sup> and Ke Du<sup>a</sup>

Table 1. Sequences of DNA and crRNA used in this study.

|                |                                                            |
|----------------|------------------------------------------------------------|
| Forward primer | 5'-GCCATTTGTCATGATGGAAAAGCACACTTTCCT-3'                    |
| Reverse primer | 5'-CTCATTGAGGCGGTCAATTTCTTTTGAATGT-3'                      |
| crRNA          | 5'-<br>UAAUUUCUACUAAGUGUAGAUUGUCUGGUAACUGU<br>GAUGUUGUA-3' |
| SARS-CoV-2     | TS: 5'... TTTG TGTCTGGTAACTGTGATGTTGTA ...-3'              |
| crRNA          | uaauuucuacuaaguguagauAUCGGUAAGAAUAGGUUU<br>GC              |

Calculation process to convert detection sensitivity in fM to that in copies/ $\mu$ L

$$10 \text{ fM} \sim \frac{10 \text{ fmole} \times 6 \times 10^{23} \text{ copies/mole}}{1 \text{ L}} \quad (1)$$

$$\sim \frac{10^{-15} \text{ mole} \times 6 \times 10^{23} \text{ copies/mole}}{10^6 \mu\text{L}} \quad (2)$$

$$\sim 6 \times 10^{23} \text{ copies}/\mu\text{L} \quad (3)$$

<sup>a</sup> Department of Mechanical Engineering, Kate Gleason College of Engineering, Rochester Institute of Technology, Rochester, NY 14623, United States

<sup>b</sup> Biological Mimetics, Inc. 124 Byte Drive, Frederick, MD 21702, United States

<sup>c</sup> Department of Electrical and Computer Engineering, University of Georgia, Athens, GA 30602, United States
